# Supplementary material
Source: PubMed Central journal article supplement (PMC3908881)
Supplement: NIHMS464197-supplement-NatNeuro.pdf [file NIHMS464197-supplement-NatNeuro.pdf]

**UNC-6 and UNC-40 promote dendritic growth through PAR-4 in *C. elegans* neurons**  
Hannah M. Teichmann and Kang Shen

**Supplementary Figure-1 (Shen).**

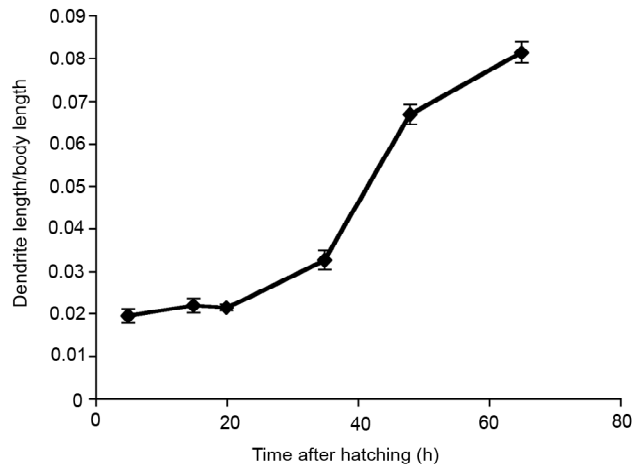

**Supplementary Fig. 1.** Dendrite length is not secondary to body length. Dendrite growth proceeds independently of the rate of body growth and decreases in rate in adults.  $n \geq 20$  on dendrite measurement,  $n \geq 12$  on body measurement. Error bars: standard error of the mean (s.e.m).

**Supplementary Figure-2 (Shen).**

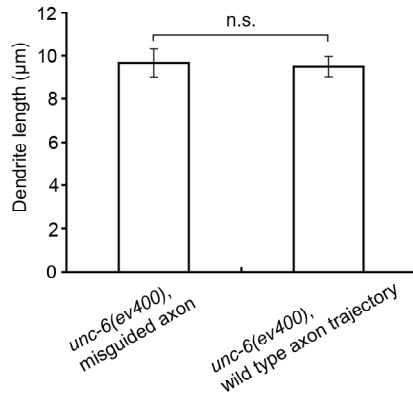

**Supplementary Fig. 2.** Dendrite length is not dependent on axon guidance. Dendrite length is not significantly different in *unc-6* mutant animals displaying axon guidance phenotypes from *unc-6* mutant animals expressing a wild-type axon trajectory.  $n \geq 35$ . Error bars: standard error of the mean (s.e.m).

Supplementary Figure-3 (Shen).

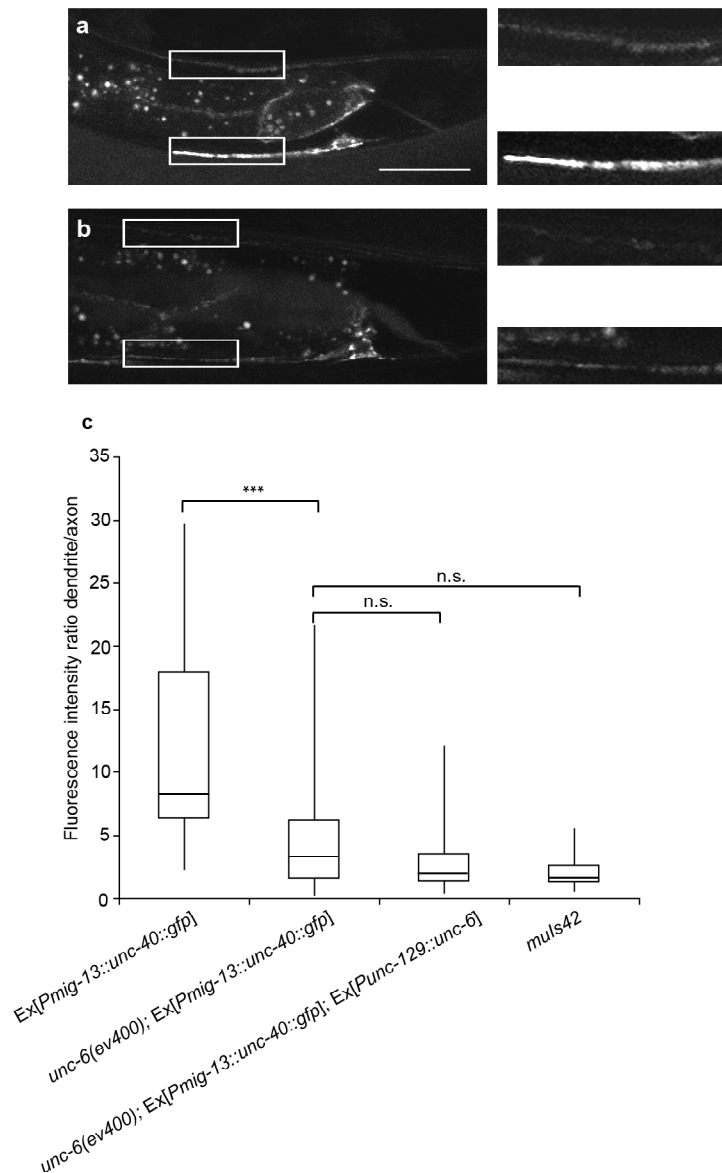

**Supplementary Fig. 3.** UNC-40 localizes to the dendrite in an *unc-6*-dependent manner. (a, b) Lateral views of L3 animals expression Ex[Pmig-13::unc-40::gfp]. (a) UNC-40::GFP expression in wild-type animals shows preferential localization to the dendrite. (b) UNC-40::GFP expression in *unc-6* mutants suppresses preferential localization to the dendrite. (c) Intensity ratio of dendrite to axon UNC-40::GFP fluorescence in wild-type, *unc-6* mutant and *unc-6* mutant expressing *unc-6* in dorsal muscle (Ex[Punc-129::unc-6]) compared to *muls42* (Pmig-13::mig-13::gfp). All animals are L3 stage, all pictures are lateral view with ventral down and anterior to the left, all quantification from anterior edge of soma to anterior tip of dendrite. Scale-bar 20  $\mu$ m.  $n \geq 20$ . \*\*\* $p < 0.001$ , Mann-Whitney U test.

Supplementary Figure-4 (Shen).

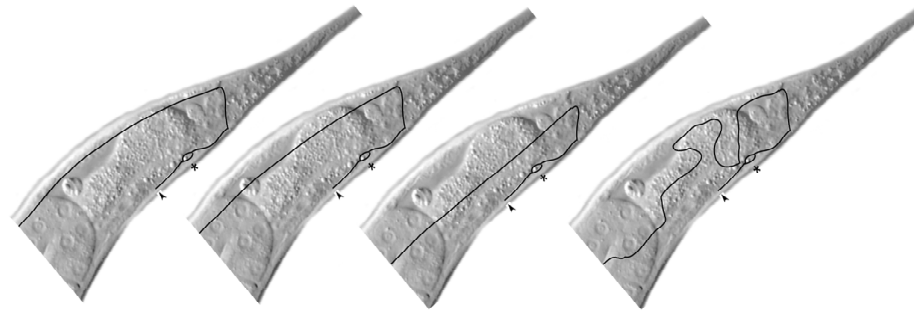

| Genotype                                                                            | dorsal axon trajectory | mid-dorsal axon trajectory | mid-body axon trajectory | dorsal-ventral axon trajectory | $\Sigma$ dorsal | $\Sigma$ not dorsal | % dorsal | $\chi^2$                 | p      |
|-------------------------------------------------------------------------------------|------------------------|----------------------------|--------------------------|--------------------------------|-----------------|---------------------|----------|--------------------------|--------|
| wild type                                                                           | 76                     | 0                          | 0                        | 0                              | 76              | (1)                 | 100      |                          |        |
| <i>unc-6</i>                                                                        | 76                     | 12                         | 0                        | 12                             | 76              | 24                  | 24       | wrt wild type<br>18.4    | <0.001 |
| <i>unc-6</i> ;<br><i>Ex[Punc-6::unc-6::nlg-1TM::mCherry]</i><br>(membrane tethered) | 56                     | 9                          | 2                        | 6                              | 56              | 17                  | 23       | wrt <i>unc-6</i><br>0.01 | >0.1   |
| <i>unc-6</i> ; <i>Ex[Punc-129::unc-6]</i><br>(dorsal muscle)                        | 56                     | 25                         | 6                        | 23                             | 56              | 54                  | 49       | wrt <i>unc-6</i><br>14.1 | <0.001 |

**Supplementary Fig. 4.** Axon guidance phenotypes in *unc-6* overexpression experiments.

Compared to the penetrance of axon guidance phenotypes in *unc-6* mutant animals, the expression of a membrane-tethered *unc-6* construct (*Ex[Punc-6::unc-6::nlg-1TM::mCherry]*) had no effect, while the expression of *unc-6* in dorsal body wall muscles (*Ex[Punc-129::unc-6]*) doubled the penetrance of dorsal axon misguidance.  $n \geq 73$ . Error bars: standard error of the mean (s.e.m). \*\*\* $p < 0.001$ ,  $\chi^2$ -test.

Supplementary Figure-5 (Shen).

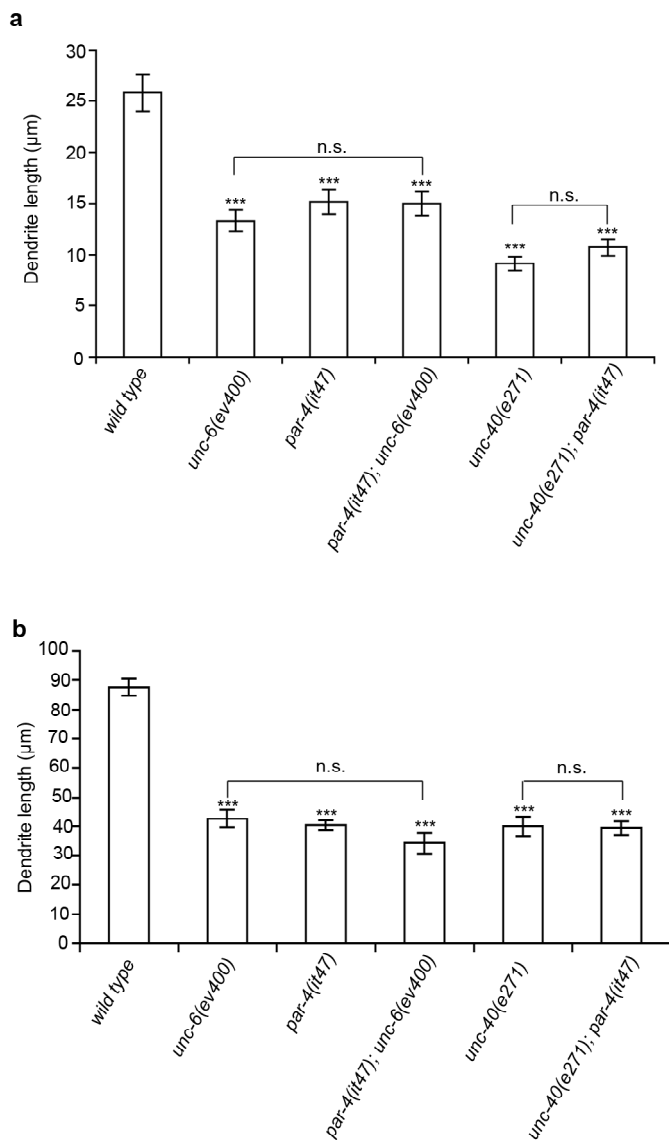

**Supplementary Fig. 5.** *par-4* acts in the same pathway as *unc-6* and *unc-40*. Graphs of dendrite lengths in wild-type, *unc-40*, *par-4*, *unc-40; par-4*, *unc-6* and *par-4; unc-6* mutants at L4 (a) and adult stages (b).  $n \geq 30$ . Error bars: standard error of the mean (s.e.m.). \*\*\* $p < 0.001$ , student's t-test.

Supplementary Figure-6 (Shen).

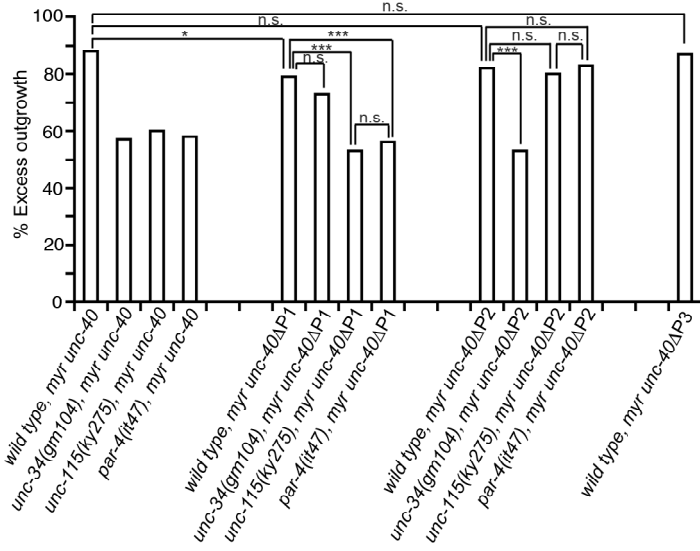

**Supplementary Fig. 6.** *unc-40* regulates *par-4* via the intracellular P2 motif. Quantification of gain of function phenotypes in AVM in adult worms in *myr::unc-40*, *myr::unc-40ΔP1*, *myr::unc-40ΔP2* and *myr::unc-40ΔP3* animals and their suppression in *unc-34*, *unc-115* and *par-4* mutants.  $n \geq 90$ . Error bars (not visible): standard error of proportion. \* $p < 0.05$ , \*\*\* $p < 0.001$ ,  $\chi^2$ -test.

## Supplementary Figure-7 (Shen).

**a**

Embryonic development:  
UNC-6-gradient-dependent axon growth and guidance mediated by **UNC-5** receptor.

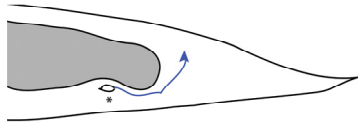

L1-adult stages:  
UNC-6-dependent presynaptic cargo exclusion from dendrite mediated by **UNC-5** receptor.

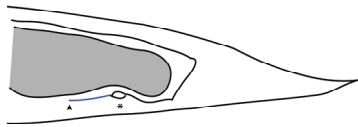

L1-adult stages:  
UNC-6-gradient-independent dendrite outgrowth mediated by **UNC-40** receptor.

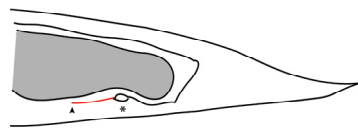

**b**

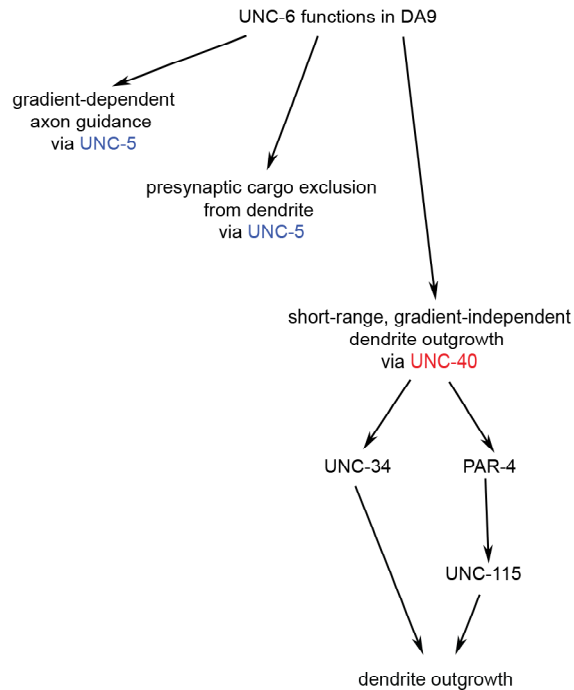

**Supplementary Fig. 7.** UNC-6 plays multiple roles in the development of one neuron. (a) During embryonic development, UNC-5 repels the DA9 axon from the graded ventral UNC-6 source; during larval development and adulthood, UNC-6 regulates dendrite outgrowth and exclusion of presynaptic cargo from the dendrite via the UNC-40 and UNC-5 receptors respectively. (b) Dendrite outgrowth is mediated by short-range UNC-6 signal acting via a novel pathway including UNC-40 and PAR-4.

### Supplementary Table 1.

In all tables below, n represents the number of animals quantified in each category. Mean represents mean length of dendrite in that category in  $\mu\text{m}$ , s.e.m. is the standard error of the mean. Where p is indicated it represents the p-value outcome of a student's t-test or Pearson's  $\chi^2$ -test as specified. Unless indicated otherwise, the p-value in a category is in a comparison of that population to wild-type. If the comparison is with a different genotype, the genotype is named before the p-value. In tables in which such comparisons occur, wild-type (wt) is stated as well.

#### Fig. 1g

|        |      |       |       |       |       |       |
|--------|------|-------|-------|-------|-------|-------|
| wt     | L1   | L2    | L3    | L4    | YA    | A     |
| n      | 28   | 30    | 113   | 50    | 21    | 32    |
| mean   | 5.75 | 10.82 | 12.82 | 25.83 | 64.18 | 87.58 |
| s.e.m. | 0.49 | 0.87  | 0.48  | 1.79  | 2.21  | 2.71  |

#### Fig. 2e

|        |      |       |       |       |
|--------|------|-------|-------|-------|
| wt     | L1   | L2    | L3    | L4    |
| n      | 28   | 30    | 113   | 50    |
| mean   | 5.75 | 10.82 | 12.82 | 25.83 |
| s.e.m. | 0.49 | 0.87  | 0.48  | 1.79  |

|        |      |      |      |       |
|--------|------|------|------|-------|
| unc-6  | L1   | L2   | L3   | L4    |
| n      | 26   | 31   | 105  | 27    |
| mean   | 3.48 | 7.44 | 9.18 | 13.34 |
| s.e.m. | 0.38 | 0.56 | 0.38 | 1.02  |

|        |      |      |       |       |
|--------|------|------|-------|-------|
| unc-5  | L1   | L2   | L3    | L4    |
| n      | 53   | 38   | 105   | 68    |
| mean   | 4.65 | 8.95 | 13.83 | 20.09 |
| s.e.m. | 0.42 | 0.77 | 0.47  | 0.77  |

|        |      |      |      |      |
|--------|------|------|------|------|
| unc-40 | L1   | L2   | L3   | L4   |
| n      | 24   | 28   | 104  | 25   |
| mean   | 0.70 | 4.78 | 5.96 | 9.12 |
| s.e.m. | 0.23 | 0.63 | 0.48 | 0.70 |

|        |      |      |      |       |
|--------|------|------|------|-------|
| unc-34 | L1   | L2   | L3   | L4    |
| n      | 28   | 36   | 21   | 22    |
| mean   | 1.55 | 5.37 | 6.45 | 12.34 |
| s.e.m. | 0.43 | 0.57 | 0.84 | 1.05  |

|         |      |      |      |      |
|---------|------|------|------|------|
| unc-115 | L1   | L2   | L3   | L4   |
| n       | 36   | 31   | 36   | 28   |
| mean    | 3.0  | 5.8  | 9.1  | 10.5 |
| s.e.m.  | 0.24 | 0.62 | 0.64 | 0.78 |

#### Fig. 2f.

|        |       |           |        |            |           |           |
|--------|-------|-----------|--------|------------|-----------|-----------|
| wt     | unc-6 | unc-5     | unc-40 | unc-34     | unc-115   |           |
| n      | 112   | 105       | 105    | 104        | 21        | 36        |
| mean   | 12.79 | 9.18      | 13.83  | 5.96       | 6.45      | 9.1       |
| s.e.m. | 0.48  | 0.38      | 0.47   | 0.48       | 0.84      | 0.64      |
| p      |       | 1.34x10-8 | 0.13   | 1.23x10-19 | 1.51x10-7 | 2.00x10-4 |

#### Fig. 3a

|        |                 |        |                        |       |                       |           |
|--------|-----------------|--------|------------------------|-------|-----------------------|-----------|
| wt     | Pmig-13::unc-40 | unc-40 | unc-40;Pmig-13::unc-40 | unc-6 | unc-6;Pmig-13::unc-40 |           |
| n      | 115             | 37     | 107                    | 20    | 105                   | 34        |
| mean   | 12.82           | 15.59  | 6.08                   | 11.47 | 9.18                  | 9.74      |
| s.e.m. | 0.47            | 0.84   | 0.48                   | 1.07  | 0.38                  | 0.50      |
| p      |                 | 0.006  | 1.38 x10-19            | 0.26  | 6.21x10-9             | 2.22x10-5 |

#### Fig. 4a

|        |       |                                       |                        |                                 |           |
|--------|-------|---------------------------------------|------------------------|---------------------------------|-----------|
| wt     | unc-6 | unc-6;Punc-6::unc-6::nlg-1TM::mCherry | unc-6; Punc-129::unc-6 | Punc-6::unc-6::nlg-1TM::mCherry |           |
| n      | 115   | 108                                   | 27                     | 28                              | 30        |
| mean   | 12.82 | 9.13                                  | 11.19                  | 12.64                           | 17.18     |
| s.e.m. | 0.47  | 0.37                                  | 0.94                   | 0.47                            | 0.79      |
| p      |       | 3.06x10-9                             | 0.13                   | 0.78                            | 1.70x10-5 |

#### Fig. 5c

|        |       |                          |                    |            |
|--------|-------|--------------------------|--------------------|------------|
| wt     | par-4 | par-4;Pitr-1::par-4::gfp | Pitr-1::par-4::gfp |            |
| n      | 115   | 108                      | 52                 | 30         |
| mean   | 12.82 | 10.12                    | 12.16              | 23.88      |
| s.e.m. | 0.47  | 0.32                     | 0.65               | 1.24       |
| p      |       | 3.47x10-6                | 0.40               | 1.68x10-12 |



**Fig. 6a.**

|        |       |                       |                       |              |                        |               |                       |                       |                       |                          |
|--------|-------|-----------------------|-----------------------|--------------|------------------------|---------------|-----------------------|-----------------------|-----------------------|--------------------------|
|        | wt    | par-4                 | unc-6                 | par-4; unc-6 | unc-40                 | unc-40; par-4 | unc-34                | unc-34, par-4         | unc-115               | par-4; unc-115           |
| n      | 112   | 108                   | 105                   | 48           | 104                    | 96            | 21                    | 33                    | 36                    | 41                       |
| mean   | 12.79 | 10.12                 | 9.18                  | 8.60         | 5.96                   | 6.16          | 6.45                  | 3.50                  | 9.1                   | 9.25                     |
| s.e.m. | 0.48  | 0.32                  | 0.38                  | 0.58         | 0.48                   | 0.41          | 0.84                  | 0.56                  | 0.64                  | 0.7                      |
| p      |       | wt                    | wt                    | unc-6        | wt                     | unc-40        | wt                    | unc-34                | wt                    | par-4                    |
|        |       | 6.34x10 <sup>-6</sup> | 1.34x10 <sup>-8</sup> | 0.4          | 1.23x10 <sup>-19</sup> | 0.75          | 1.51x10 <sup>-7</sup> | 5.88x10 <sup>-3</sup> | 2.00x10 <sup>-4</sup> | 0.26;<br>unc-115<br>0.93 |

**Fig. 6b.**

|        |       |                       |                        |                      |                          |                           |                       |
|--------|-------|-----------------------|------------------------|----------------------|--------------------------|---------------------------|-----------------------|
|        | wt    | unc-6                 | unc-40                 | par-4                | unc-6;Pitr-1::par-4::gfp | unc-40;Pitr-1::par-4::gfp | par-4;Pmig-13::unc-40 |
| n      | 112   | 105                   | 104                    | 108                  | 30                       | 21                        | 33                    |
| mean   | 12.79 | 9.18                  | 5.96                   | 10.12                | 21.44                    | 21.37                     | 9.39                  |
| s.e.m. | 0.48  | 0.38                  | 0.48                   | 0.32                 | 0.85                     | 1.31                      | 0.78                  |
| p      |       | wt                    | wt                     | wt                   | unc-6                    | wt                        | wt                    |
|        |       | 1.34x10 <sup>-8</sup> | 1.23x10 <sup>-19</sup> | 6.4x10 <sup>-6</sup> | 2.11x10 <sup>-15</sup>   | 2.31 x 10 <sup>-6</sup>   | 3.16x10 <sup>-4</sup> |
|        |       |                       |                        |                      | wt                       | unc-40                    | par-4                 |
|        |       |                       |                        |                      | 1.36x10 <sup>-11</sup>   | 3.37x10 <sup>-10</sup>    | 0.36                  |

**Fig. 6c.**

|        |       |                       |                       |                          |                        |                                           |
|--------|-------|-----------------------|-----------------------|--------------------------|------------------------|-------------------------------------------|
|        | wt    | unc-115               | par-4                 | par-4; unc-115           | Pitr-1::par-4::gfp     | unc-115; Pitr-1::par-4::gfp.              |
| n      | 112   | 36                    | 108                   | 41                       | 30                     | 2                                         |
| mean   | 12.79 | 9.1                   | 10.12                 | 9.25                     | 23.88                  | 9.30                                      |
| s.e.m. | 0.48  | 0.64                  | 0.32                  | 0.7                      | 1.24                   | 0.97                                      |
| p      |       | wt                    | wt                    | par-4                    | wt                     | Pitr-1::par-4::gfp                        |
|        |       | 2.00x10 <sup>-4</sup> | 6.34x10 <sup>-6</sup> | 0.26;<br>unc-115<br>0.93 | 1.68x10 <sup>-12</sup> | 4.83x10 <sup>-13</sup><br>unc-115<br>0.87 |

**Fig.7c.**

|                |       |       |        |               |
|----------------|-------|-------|--------|---------------|
|                | wt    | par-4 | unc-34 | unc-34, par-4 |
| n              | 105   | 101   | 101    | 125           |
| guidance       | 0/105 | 0/101 | 3/101  | 13/125        |
| s.e.p.         | -     | -     | 0.02   | 0.03          |
| p ( $\chi^2$ ) |       |       | unc-34 | 0.03          |

**Fig.7d.**

|                |       |       |        |               |
|----------------|-------|-------|--------|---------------|
|                | wt    | par-4 | unc-34 | unc-34, par-4 |
| n              | 105   | 101   | 101    | 125           |
| guidance       | 0/105 | 0/101 | 0/101  | 8/125         |
| s.e.p.         | -     | -     | -      | 0.02          |
| p ( $\chi^2$ ) |       |       | unc-34 | 0.015         |

**Supplementary Fig. 1.**

|                                          |        |        |        |        |        |         |
|------------------------------------------|--------|--------|--------|--------|--------|---------|
|                                          | L1     | L2     | L3     | L4     | YA     | A       |
| n body length                            | 16     | 14     | 13     | 12     | 17     | 27      |
| Mean body length                         | 298.38 | 496.32 | 601.15 | 794.54 | 962.26 | 1077.43 |
| s.e.m. body length                       | 8.52   | 15.48  | 11.55  | 17.62  | 8.55   | 16.80   |
| Mean dendrite/<br>body length (Fig. 1g)  | 0.019  | 0.022  | 0.021  | 0.033  | 0.067  | 0.081   |
| Propagated error<br>dendrite/body length | 0.002  | 0.002  | 0.001  | 0.002  | 0.002  | 0.003   |

**Supplementary Fig. 2.**

|        |                   |                        |
|--------|-------------------|------------------------|
|        | Unc-6 dorsal axon | Unc-6 axon misguided   |
| n      | 36                | 46                     |
| mean   | 9.66              | 9.49                   |
| s.e.m. | 0.64              | 0.47                   |
| p      |                   | unc-6 dorsal axon 0.75 |

**Supplementary Fig. 3.**

|                            |                      |                                 |                                              |                                      |
|----------------------------|----------------------|---------------------------------|----------------------------------------------|--------------------------------------|
|                            | Pmig-13::unc-40::gfp | unc-6, Pmig-13::unc-40::gfp     | unc-6, Pmig-13::unc-40::gfp, Punc-129::unc-6 | muIs42                               |
| n                          | 21                   | 22                              | 21                                           | 20                                   |
| median                     | 8.83                 | 3.26                            | 1.97                                         | 1.67                                 |
| IQR                        | 11.64                | 4.765                           | 2.28                                         | 1.42                                 |
| p<br>(Mann-Whitney U test) |                      | Pmig-13::unc-40::gfp<br>0.00077 | unc-6, Pmig-13::unc-40::gfp<br>0.17          | unc-6, Pmig-13::unc-40::gfp<br>0.066 |

**Supplementary Fig. 4.- see Supplementary Figure 4.**

**Supplementary Fig. 5a.**

|        | wt   | unc-6                | par-4                 | par-4; unc-6          | unc-40                 | unc-40; par-4          |
|--------|------|----------------------|-----------------------|-----------------------|------------------------|------------------------|
| n      | 52   | 27                   | 28                    | 56                    | 25                     | 48                     |
| mean   | 25.8 | 13.3                 | 15.1                  | 15.0                  | 9.1                    | 10.7                   |
| s.e.m. | 1.8  | 1.01                 | 1.2                   | 1.1                   | 0.7                    | 0.8                    |
| p      |      | 5.6x10 <sup>-8</sup> | 4.1 x10 <sup>-6</sup> | 2.0 x10 <sup>-6</sup> | 2.5 x10 <sup>-12</sup> | 8.2 x10 <sup>-11</sup> |
|        |      |                      | unc-6                 |                       | unc-40                 |                        |
|        |      |                      | 0.29                  |                       | 0.14                   |                        |

**Supplementary Fig. 5b.**

|        | wt    | unc-6                  | par-4                  | par-4; unc-6           | unc-40                 | unc-40; par-4          |
|--------|-------|------------------------|------------------------|------------------------|------------------------|------------------------|
| n      | 32    | 28                     | 37                     | 39                     | 21                     | 36                     |
| mean   | 87.58 | 42.71                  | 40.40                  | 34.31                  | 40.10                  | 39.47                  |
| s.e.m. | 2.71  | 3.08                   | 1.72                   | 3.62                   | 3.27                   | 2.33                   |
| p      |       | 4.5 x10 <sup>-15</sup> | 1.9 x10 <sup>-20</sup> | 5.9 x10 <sup>-18</sup> | 2.2 x10 <sup>-14</sup> | 3.1 x10 <sup>-20</sup> |
|        |       |                        | par-4                  |                        | unc-40                 |                        |
|        |       |                        | 0.13                   |                        | 0.85                   |                        |

**Supplementary Fig. 6.**

| genotype                | n   | gain of function | s.e.p | p ((χ <sup>2</sup> ))        |
|-------------------------|-----|------------------|-------|------------------------------|
| myr::unc-40             | 113 | 100              | 0.03  |                              |
| unc-34; myr::unc-40     | 94  | 54               | 0.05  | myr::unc-40 <.0001           |
| unc-115; myr::unc-40    | 92  | 55               | 0.05  | myr::unc-40 <.0001           |
| par-4; myr::unc-40      | 90  | 52               | 0.05  | myr::unc-40 <.0001           |
| myr::unc-40ΔP1          | 113 | 89               | 0.04  | myr::unc-40 0.048            |
| unc-34; myr::unc-40ΔP1  | 92  | 67               | 0.05  | myr::unc-40ΔP1 0.32          |
| unc-115; myr::unc-40ΔP1 | 118 | 62               | 0.05  | myr::unc-40ΔP1 <.0001        |
| par-4; myr::unc-40ΔP1   | 94  | 53               | 0.05  | myr::unc-40ΔP1 <.0001        |
|                         |     |                  |       | unc-115; myr::unc-40ΔP1 0.58 |
| myr::unc-40ΔP2          | 97  | 80               | 0.04  | myr::unc-40 0.21             |
| unc-34; myr::unc-40ΔP2  | 90  | 47               | 0.05  | myr::unc-40ΔP2 <.0001        |
| unc-115; myr::unc-40ΔP2 | 94  | 75               | 0.04  | myr::unc-40ΔP2 0.63          |
| par-4; myr::unc-40ΔP2   | 90  | 74               | 0.04  | myr::unc-40ΔP2 1.0           |
|                         |     |                  |       | unc-115; myr::unc-40ΔP2 0.67 |
| myr::unc-40ΔP3          | 101 | 88               | 0.03  | myr::unc-40 0.76             |
